# Supplementary material for: An Unusual Phage Repressor Encoded by Mycobacteriophage BPs
Source: PubMed Central journal article supplement (PMC4557955; doi:10.1371/journal.pone.0137187), 2015-09-02
Supplement: pone.0137187.s001.pdf [file pone.0137187.s001.pdf]

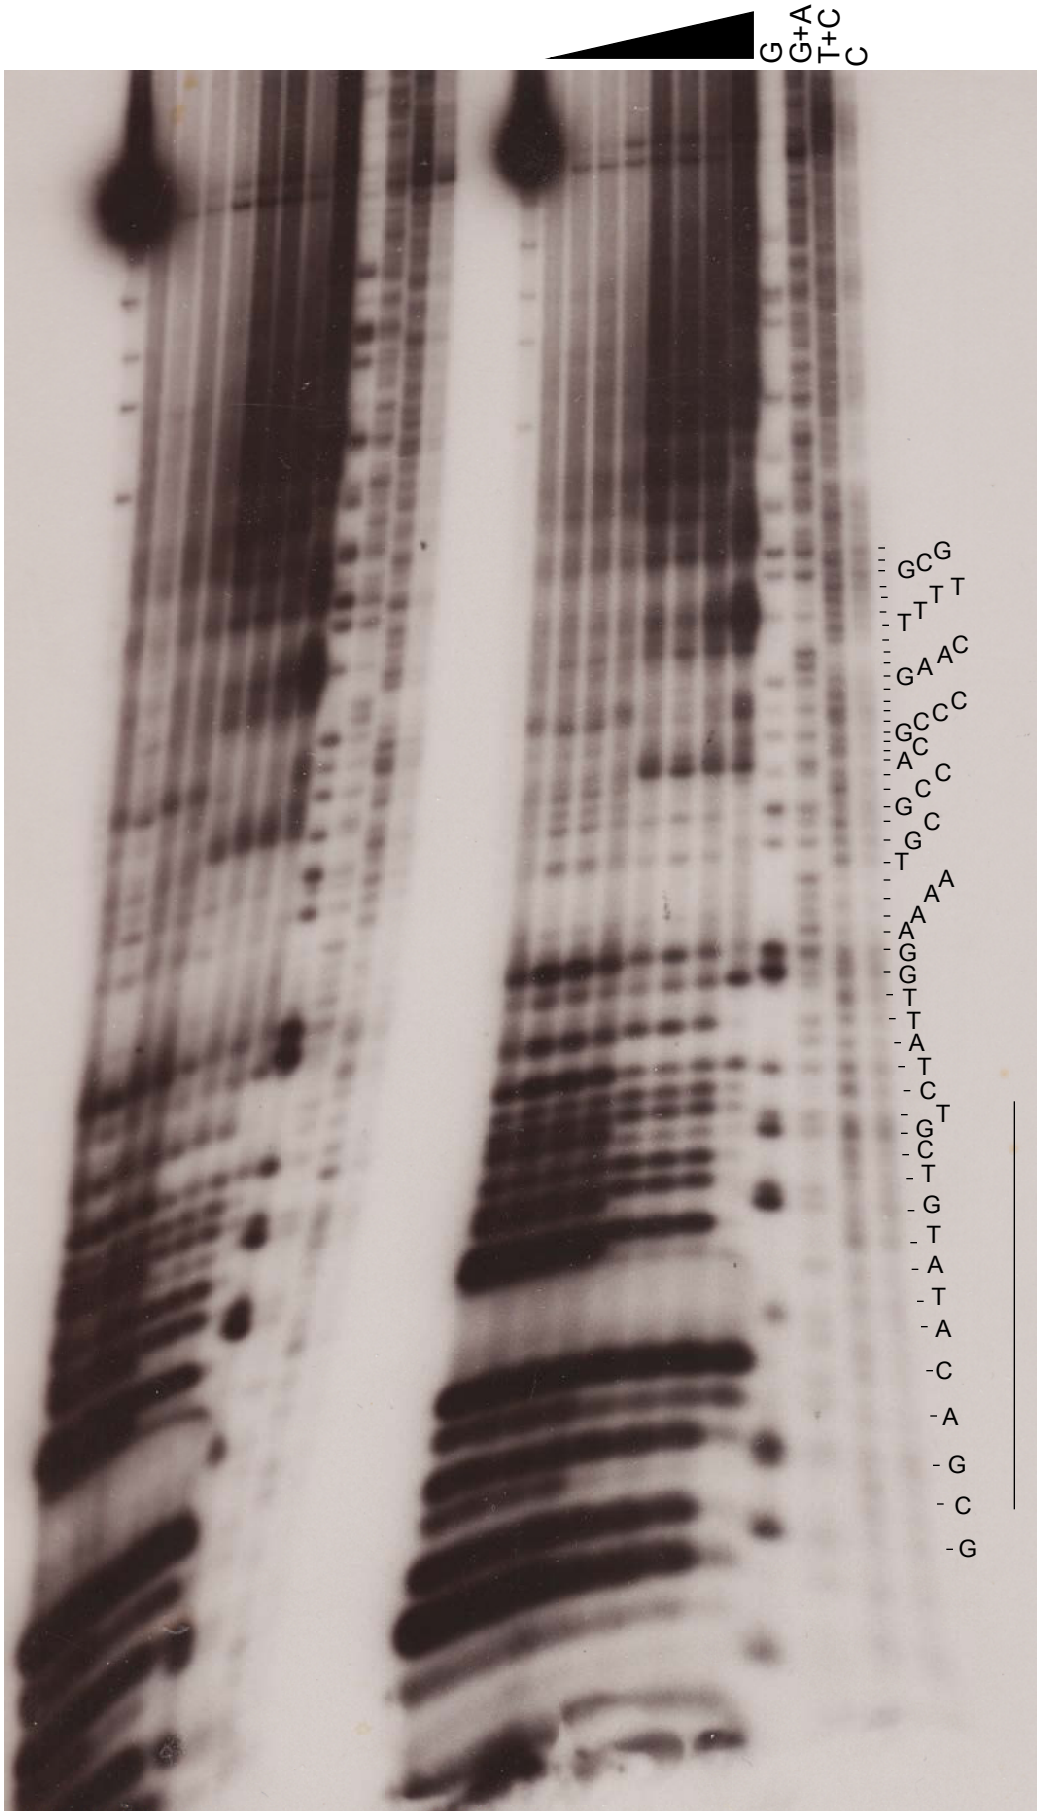

Figure S1
